# Supplementary material
Source: Springer Nature journal article supplement (https://www.springermedizin.de/resource/supplementary/12990_2010_361_MOESM3_ESM.pdf/9613184)

**A.**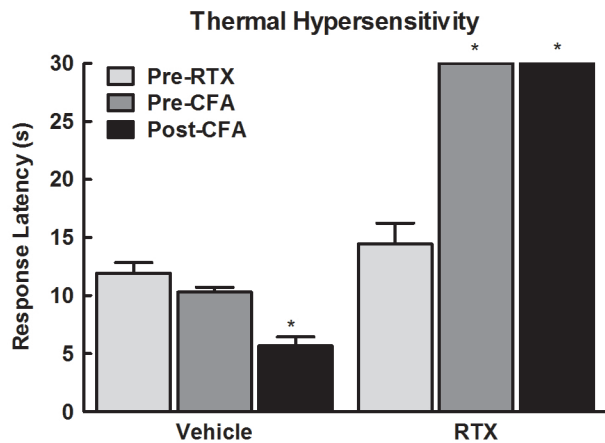**B.**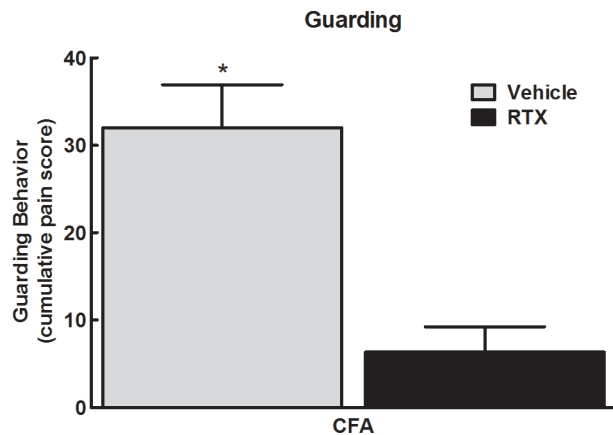**C.**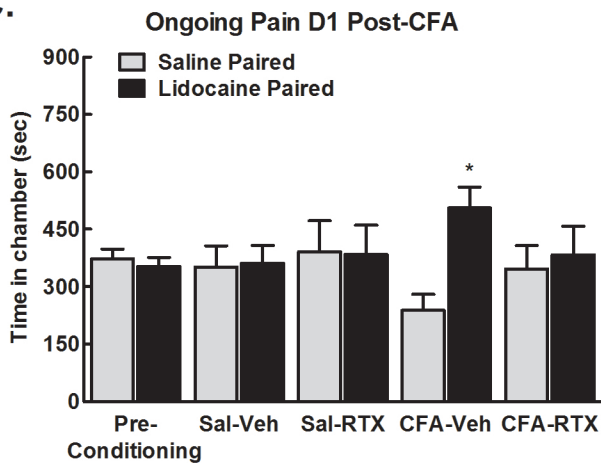**D.**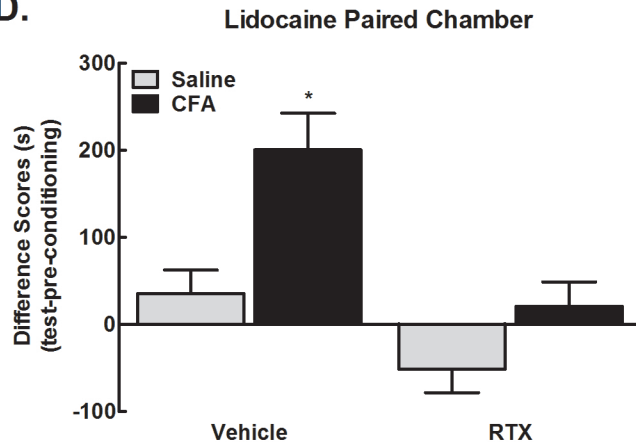

Supplement: MOESM3 [file 9613184]
